# Supplementary material for: A statistical procedure to create a neighborhood socioeconomic index for health inequalities analysis
Source: PubMed Central journal article supplement (PMC3621558; doi:10.1186/1475-9276-12-21), 2013-03-28
Supplement: 1475-9276-12-21-S1.pdf [file 1475-9276-12-21-S1.pdf]

**Additional file 1. Base Socioeconomic Characteristics of the Three Study Urban Areas**

|                                                              | <b>Lille Métropole</b> | <b>Grand Lyon</b>      | <b>Aix-Marseille</b>   |
|--------------------------------------------------------------|------------------------|------------------------|------------------------|
| People under the age of 25 (%) <sup>b</sup>                  | 36.0 (32.8-40.6)       | 32.1 (28.8-35.8)       | 29.6 (25.7-33.7)       |
| Single-parent families (%) <sup>b</sup>                      | 13.9 (10.1-19.8)       | 13.9 (10.8-16.9)       | 17.5 (13.3-22.4)       |
| Foreigners (%) <sup>b</sup>                                  | 3.9 (1.9-7.9)          | 6.6 (4.3-11.1)         | 3.5 (2.0-7.5)          |
| Foreign immigrants since the last census (%) <sup>b</sup>    | 1.3 (0.7-2.2)          | 2.3 (1.2-3.6)          | 1.5 (0.9-3.0)          |
| Unemployment rate (%) <sup>b</sup>                           | 13.6 (9.2-19.9)        | 11.0 (8.3-15.0)        | 17.7 (13.2-25.3)       |
| Self-employed (%) <sup>b</sup>                               | 5.6 (4.0-8.3)          | 7.3 (5.3-10.5)         | 7.6 (5.3-11.4)         |
| Unstable jobs (%) <sup>b</sup>                               | 11.6 (9.1-14.7)        | 11.1 (9.0-13.6)        | 10.6 (8.5-12.4)        |
| Steady jobs (%) <sup>b</sup>                                 | 67.4 (59.7-72.3)       | 68.2 (61.1-72.5)       | 61.7 (53.9-66.4)       |
| Managers (%) <sup>b</sup>                                    | 9.7 (4.8-17.8)         | 13.4 (6.4-22.9)        | 9.3 (4.5-17.2)         |
| Blue-collar workers (%) <sup>b</sup>                         | 21.0 (13.7-28.3)       | 16.7 (10.2-25.1)       | 14.7 (8.9-20.0)        |
| Median Income (€) <sup>a, b</sup>                            | 21,165 (17,033-25,663) | 22,656 (19,004-27,056) | 20,318 (15,913-25,988) |
| People with no diploma (%) <sup>b</sup>                      | 17.0 (10.6-23.6)       | 14.1 (9.9-21.7)        | 17.7 (12.5-25.3)       |
| General or vocational maturity certificates (%) <sup>b</sup> | 9.8 (8.3-11.9)         | 11.2 (9.4-12.7)        | 11.1 (8.7-12.9)        |
| At least lower tertiary education (%) <sup>b</sup>           | 8.0 (5.7-10.3)         | 9.7 (6.4-12.2)         | 7.8 (5.1-10.2)         |
| Individual houses (%) <sup>b</sup>                           | 68.3 (33.0-88.5)       | 8.4 (1.1-37.9)         | 16.8 (3.3-60.3)        |
| Multiple dwelling units (%) <sup>b</sup>                     | 26.1 (7.0-62.3)        | 88.6 (57.5-96.6)       | 80.9 (36.3-94.0)       |
| Non-owner-occupied (%) <sup>b</sup>                          | 44.2 (25.9-69.7)       | 58.3 (39.9-72.6)       | 51.2 (35.2-68.7)       |
| Subsidized housing (%) <sup>b</sup>                          | 10.3 (0.6-29.0)        | 13.4 (2.2-34.7)        | 6.3 (0.0-27.3)         |
| Houses with parking space (%) <sup>b</sup>                   | 43.8 (26.5-64.4)       | 52.9 (34.0-72.7)       | 42.6 (22.3-67.2)       |
| More than one person per room (%) <sup>b</sup>               | 6.0 (4.1-9.2)          | 7.1 (5.4-9.7)          | 7.7 (5.9-11.3)         |
| Average number of people per room <sup>a, b</sup>            | 0.65 (0.61-0.72)       | 0.70 (0.66-0.76)       | 0.71 (0.67-0.76)       |
| Without a car (%) <sup>b</sup>                               | 24.1 (14.5-33.6)       | 23.1 (11.7-32.3)       | 21.9 (11.9-36.3)       |
| With 2 or more cars (%) <sup>b</sup>                         | 22.5 (14.7-37.2)       | 21.9 (14.5-34.7)       | 23.2 (12.6-36.2)       |

<sup>a</sup> Not a proportion ; <sup>b</sup> Median (Quartiles) among the census blocks of the metropolitan area

See Table 1 for precise definitions
