# Supplementary material for: A statistical procedure to create a neighborhood socioeconomic index for health inequalities analysis
Source: PubMed Central journal article supplement (PMC3621558; doi:10.1186/1475-9276-12-21), 2013-03-28
Supplement: 1475-9276-12-21-S3.pdf [file 1475-9276-12-21-S3.pdf]

**Additional file 3. Correlations and Contributions of Variables to the First Component and Variance Explained by the First Component, According to the Study Area**

| Variables                                                                   | Lille Métropole    |                  | Grand Lyon         |                  | Marseille urban unit |                  | Global             |                  |
|-----------------------------------------------------------------------------|--------------------|------------------|--------------------|------------------|----------------------|------------------|--------------------|------------------|
|                                                                             | Coord <sup>a</sup> | Ctr <sup>b</sup> | Coord <sup>a</sup> | Ctr <sup>b</sup> | Coord <sup>a</sup>   | Ctr <sup>b</sup> | Coord <sup>a</sup> | Ctr <sup>b</sup> |
| SINGLE-PARENT FAMILIES                                                      | 0.86               | 5.79             | 0.79               | 5.44             | 0.86                 | 6.38             | 0.83               | 6.29             |
| FOREIGNERS                                                                  | 0.82               | 5.33             | 0.87               | 6.59             | 0.79                 | 5.51             | 0.78               | 5.66             |
| FOREIGN IMMIGRANTS (SINCE THE LAST CENSUS)                                  | 0.70               | 3.88             | 0.67               | 3.84             | 0.65                 | 3.67             | 0.62               | 3.59             |
| SELF-EMPLOYED                                                               | -0.61              | 2.89             | -0.70              | 4.22             | -0.63                | 3.45             | -0.62              | 3.57             |
| UNSTABLE JOBS                                                               | 0.88               | 6.14             | 0.79               | 5.45             | 0.62                 | 3.32             | 0.73               | 4.91             |
| STEADY JOBS                                                                 | -0.89              | 6.16             | -0.76              | 5.03             | -0.85                | 6.29             | -0.83              | 6.29             |
| MEDIAN INCOME                                                               | -0.71              | 3.97             | -0.78              | 5.27             | -0.86                | 6.48             | -0.80              | 5.83             |
| NO DIPLOMA                                                                  | 0.74               | 4.29             | 0.84               | 6.14             | 0.81                 | 5.69             | 0.83               | 6.33             |
| BASIC OR INTERMEDIATE GENERAL OR VOCATION QUALIFICATIONS                    | -0.71              | 3.98             | -0.79              | 5.43             | -0.72                | 4.52             | -0.74              | 5.06             |
| GENERAL OR VOCATIONAL MATURITY CERTIFICATES                                 | -0.64              | 3.26             | -0.75              | 4.88             | -0.75                | 4.95             | -0.74              | 5.08             |
| NON-OWNER-OCCUPIED IN THE MAIN RESIDENCES                                   | 0.85               | 5.61             | 0.77               | 5.11             | 0.83                 | 6.01             | 0.78               | 5.62             |
| MAIN RESIDENCES WITH MORE THAN ONE PERSON PER ROOM                          | 0.81               | 5.16             | 0.83               | 5.91             | 0.74                 | 4.73             | 0.79               | 5.74             |
| AVERAGE NUMBER OF PEOPLE PER ROOM                                           | 0.85               | 5.66             | 0.78               | 5.24             | 0.73                 | 4.64             | 0.76               | 5.26             |
| HOUSEHOLDS WITHOUT A CAR                                                    | 0.90               | 6.30             | 0.66               | 3.80             | 0.84                 | 6.13             | 0.79               | 5.79             |
| HOUSEHOLD WITH 2 OR MORE CARS                                               | -0.86              | 5.77             | -0.67              | 3.92             | -0.80                | 5.55             | -0.76              | 5.27             |
| Under age of 25                                                             | 0.65               | 3.28             | -                  | -                | -                    | -                | -                  | -                |
| Unemployed for more than 1 year                                             | 0.87               | 5.97             | -                  | -                | -                    | -                | -                  | -                |
| Individual house                                                            | -0.69              | 3.69             | -                  | -                | -0.65                | 3.66             | -                  | -                |
| Multiple dwelling units                                                     | 0.67               | 3.51             | -                  | -                | 0.63                 | 3.50             | -                  | -                |
| Subsidized housing                                                          | 0.75               | 4.38             | 0.80               | 5.50             | -                    | -                | 0.67               | 4.13             |
| Parking space                                                               | -0.80              | 4.98             | -0.59              | 3.01             | -0.75                | 4.87             | -0.71              | 4.66             |
| Unemployed                                                                  | -                  | -                | 0.93               | 7.48             | 0.92                 | 7.44             | 0.90               | 7.38             |
| Managers                                                                    | -                  | -                | -0.65              | 3.64             | -0.61                | 3.20             | -0.62              | 3.55             |
| Blue-collar workers                                                         | -                  | -                | 0.69               | 4.11             | -                    | -                | -                  | -                |
| <i>Contribution of the common variables to the 1<sup>st</sup> component</i> | 80.16%             |                  | 83.75%             |                  | 77.62%               |                  | 87.67%             |                  |
| <i>Variance explained by the first component</i>                            | 60.73%             |                  | 57.79%             |                  | 57.29%               |                  | 57.22%             |                  |

<sup>a</sup> Coordinate of the variable on the first axis, i.e. correlation coefficient between the variable and the socio-economic index

<sup>b</sup> Contribution of the variable to the first component (in %)

UPPERCASE : variables selected commonly for each metropolitan areas and global analysis
