# Supplementary material for: A statistical procedure to create a neighborhood socioeconomic index for health inequalities analysis
Source: PubMed Central journal article supplement (PMC3621558; doi:10.1186/1475-9276-12-21), 2013-03-28
Supplement: 1475-9276-12-21-S4.pdf [file 1475-9276-12-21-S4.pdf]

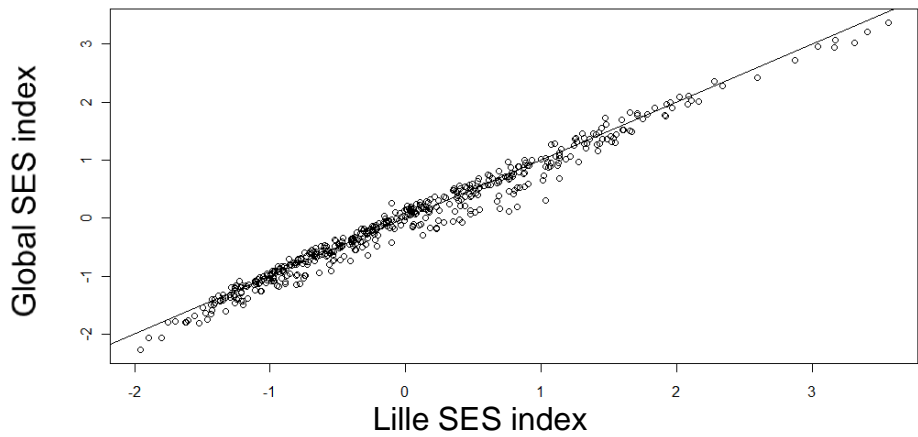

**A. Lille**

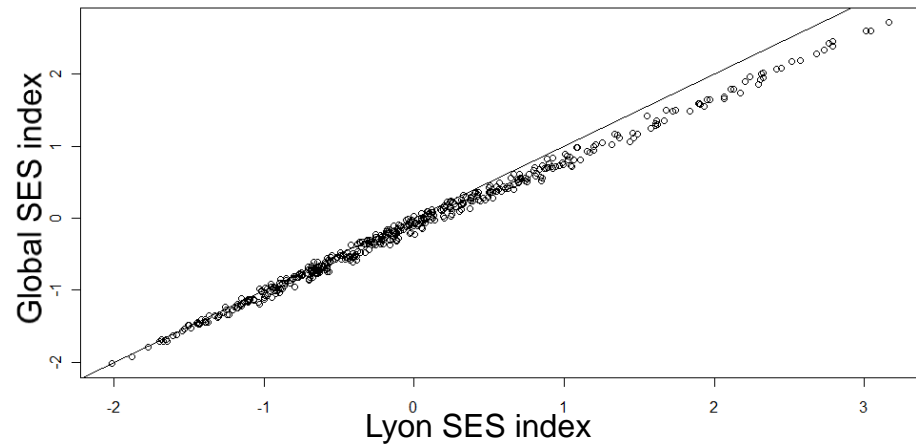

**B. Lyon**

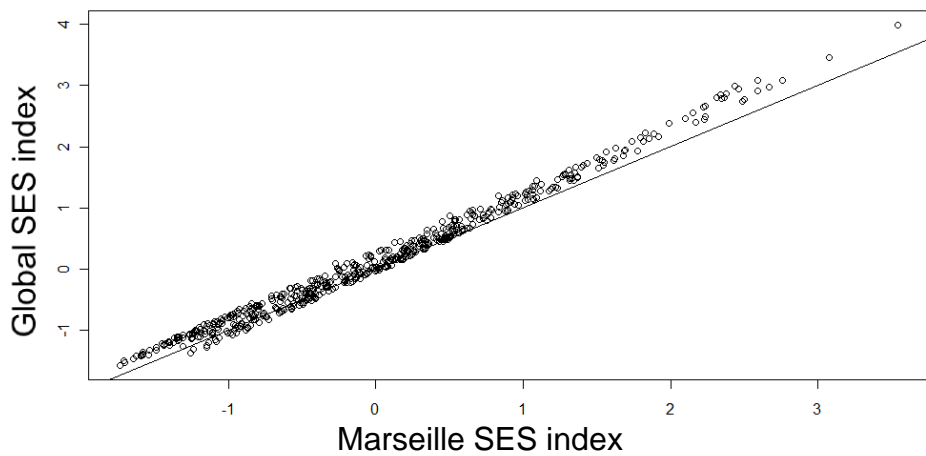

**C. Marseille**

**Additional file 4.** Plot of city SES indices vs. global index restricted to each city (housing census blocks only).
