# Supplementary material for: A statistical procedure to create a neighborhood socioeconomic index for health inequalities analysis
Source: PubMed Central journal article supplement (PMC3621558; doi:10.1186/1475-9276-12-21), 2013-03-28
Supplement: 1475-9276-12-21-S5.pdf [file 1475-9276-12-21-S5.pdf]

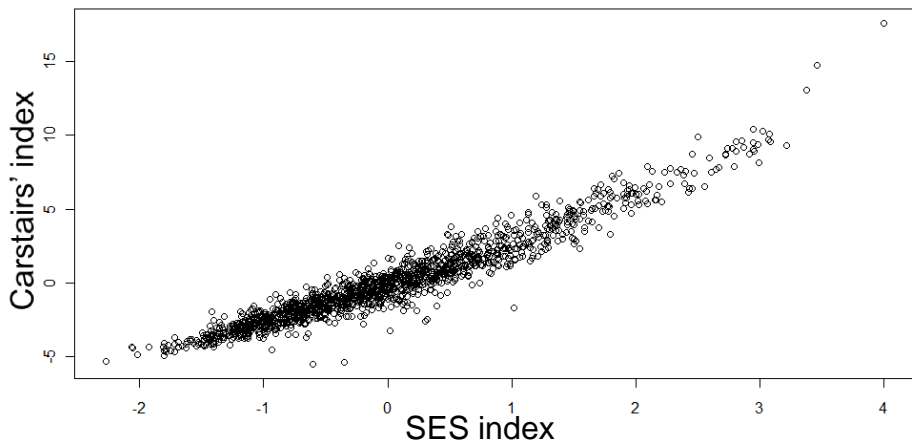

**A. Global**

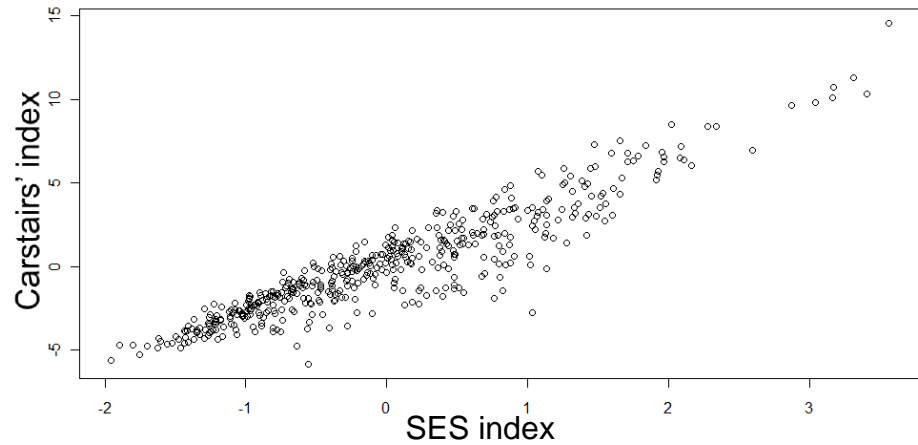

**B. Lille**

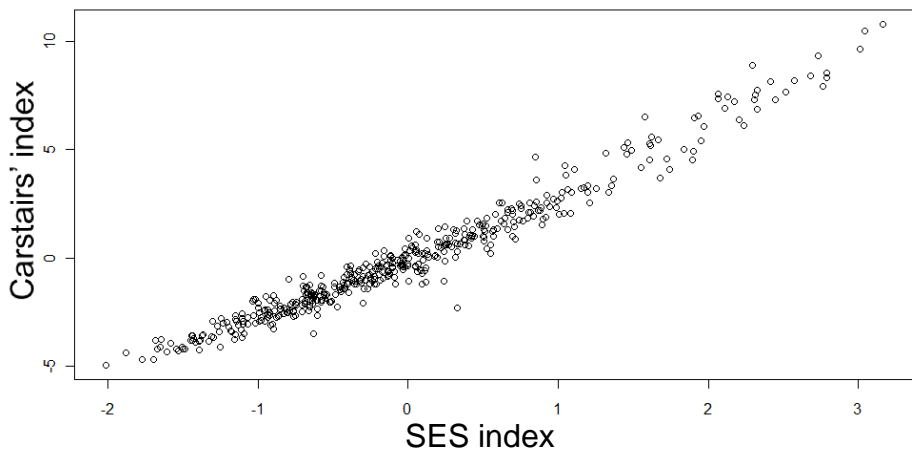

**C. Lyon**

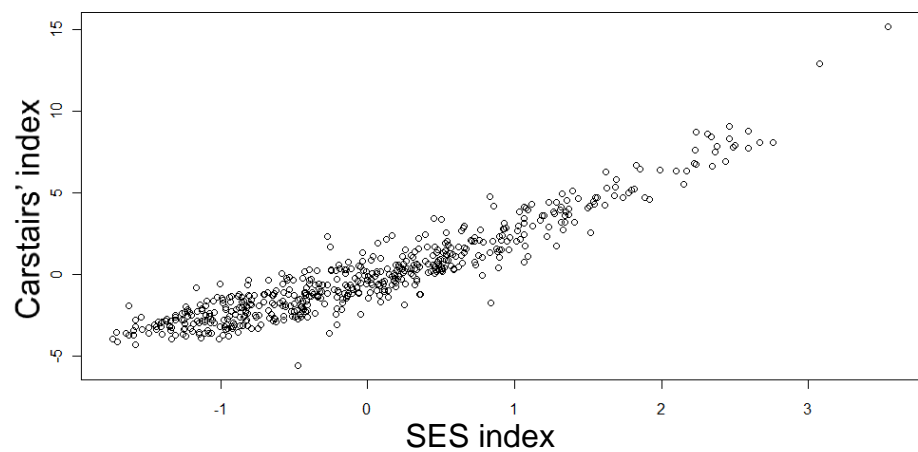

**D. Marseille**

**Additional file 5.** Plot of SES index vs. Carstairs' index, according to the study area (housing census blocks only).
