# Supplementary material for: A statistical procedure to create a neighborhood socioeconomic index for health inequalities analysis
Source: Int J Equity Health. 2013 Mar 28;12:21. doi: 10.1186/1475-9276-12-21 (PMC3621558; doi:10.1186/1475-9276-12-21)
Supplement: Additional file 7 — Average Values of the Common Variables per Category Created With HC for the Global Analysis. [file 1475-9276-12-21-S7.pdf]

**Additional file 7. Average Values of the Common Variables per Category Created With HC for the Global Analysis**

| <b>Variables</b>                                         | <b>Category 1</b><br>(lowest index values) | <b>Category 2</b> | <b>Category 3</b><br>(highest index values) |
|----------------------------------------------------------|--------------------------------------------|-------------------|---------------------------------------------|
| SINGLE-PARENT FAMILIES                                   | 11.67%                                     | 17.56%            | 26.07%                                      |
| FOREIGNERS                                               | 2.96%                                      | 7.02%             | 17.49%                                      |
| FOREIGN IMMIGRANTS (SINCE THE LAST CENSUS)               | 1.32%                                      | 2.38%             | 5.29%                                       |
| SELF-EMPLOYED                                            | 10.52%                                     | 6.48%             | 4.04%                                       |
| UNSTABLE JOBS                                            | 8.92%                                      | 12.70%            | 14.95%                                      |
| STEADY JOBS                                              | 69.88%                                     | 62.91%            | 45.01%                                      |
| MEDIAN INCOME                                            | 27,448 €                                   | 19,832 €          | 13,517 €                                    |
| NO DIPLOMA                                               | 12.24%                                     | 19.17%            | 33.90%                                      |
| BASIC OR INTERMEDIATE GENERAL OR VOCATION QUALIFICATIONS | 12.46%                                     | 10.00%            | 7.17%                                       |
| GENERAL OR VOCATIONAL MATURITY CERTIFICATES              | 10.58%                                     | 7.71%             | 3.94%                                       |
| NON-OWNER-OCCUPIED IN THE MAIN RESIDENCES                | 33.72%                                     | 60.60%            | 80.38%                                      |
| MAIN RESIDENCES WITH MORE THAN ONE PERSON PER ROOM       | 5.62%                                      | 8.31%             | 18.86%                                      |
| AVERAGE NUMBER OF PEOPLE PER ROOM                        | 0.65 person/room                           | 0.71 person/room  | 0.83 person/room                            |
| HOUSEHOLDS WITHOUT A CAR                                 | 13.00%                                     | 30.40%            | 42.76%                                      |
| HOUSEHOLD WITH 2 OR MORE CARS                            | 39.30%                                     | 17.89%            | 11.27%                                      |
| Subsidized housing                                       | 7.18%                                      | 25.08%            | 60.15%                                      |
| Parking space                                            | 66.48%                                     | 34.91%            | 22.57%                                      |
| Unemployed                                               | 10.43%                                     | 17.67%            | 35.72%                                      |
| Managers                                                 | 18.41%                                     | 11.37%            | 3.19%                                       |

UPPERCASE : variables selected commonly for each metropolitan areas and global analysis
